# Supplementary figures and images for: Green Extraction Approach for Isolation of Bioactive Compounds in Wild Thyme (Thymus serpyllum L.) Herbal Dust—Chemical Profile, Antioxidant and Antimicrobial Activity and Comparison with Conventional Techniques
Source: MDPI journal article supplement (doi:10.3390/plants13060897), 2024-03-20

## Supplementary material

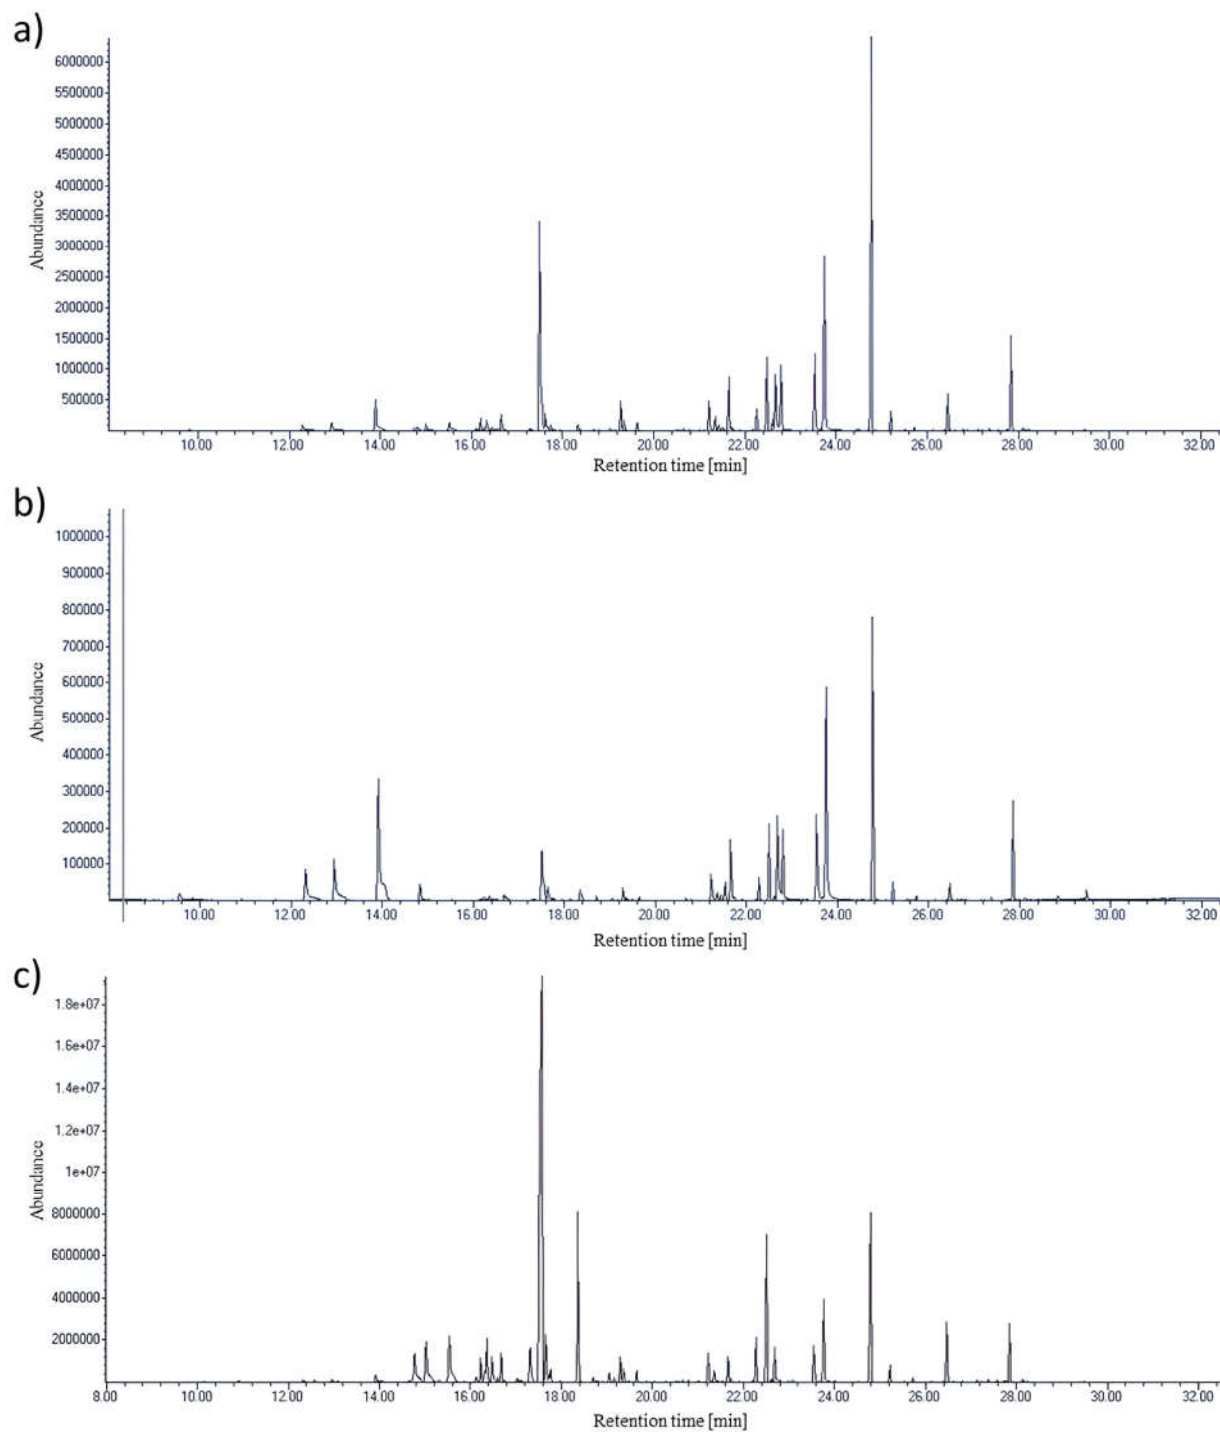

**Figure S1.** GC chromatograms of a) SFE-2, b) SOX-Hex and c) HD-EO

Supplement: s1 [file s1]
